# Supplementary material for: Well-dispersed palladium nanoparticles on graphene oxide as a non-enzymatic glucose sensor
Source: Royal Society of Chemistry journal article supplement (doi:10.1039/c2ra20425h), 2012-01-01
Supplement: c2ra20425h.pdf [file c2ra20425h.pdf]

## Supplementary Material

# **Well-Dispersive Palladium Nanoparticles on Graphene Oxide for Nonenzymatic Glucose Sensor**

Qiyu Wang, Xiaoqiang Cui\*, Jianli Chen, Xianliang Zheng, Chang Liu, Tianyu Xue,

Haitao Wang, Zhao Jin, Liang Qiao, Weitao Zheng\*

Department of Materials Science, Key Laboratory of Automobile Materials of  
MOE and State Key Laboratory of Superhard Materials, Jilin University,  
Changchun 130012 People's Republic of China

Corresponding Author: Tel & Fax: +86-431-85155279, E-mail address:

[xqcui@jlu.edu.cn](mailto:xqcui@jlu.edu.cn) (XQ Cui), [wzheng@jlu.edu.cn](mailto:wzheng@jlu.edu.cn) (WT Zheng)

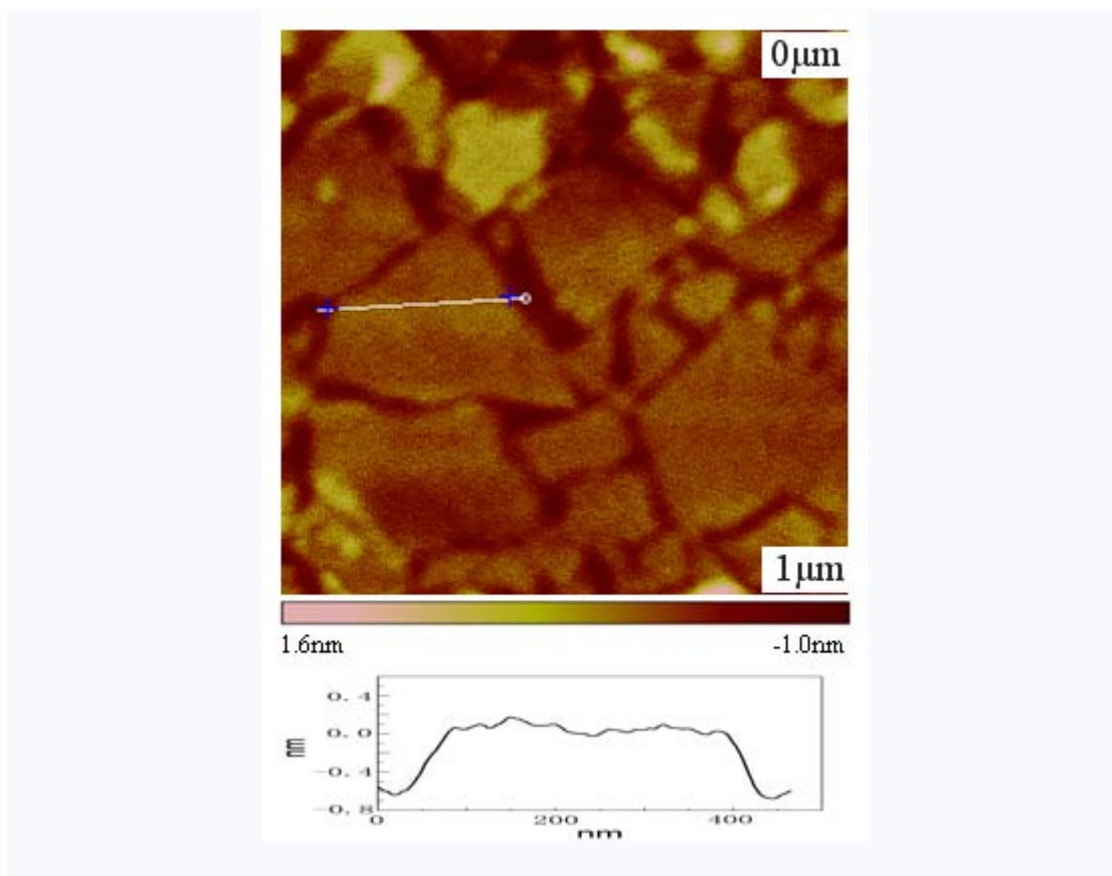

Fig. S1 AFM image and height profile of GO.

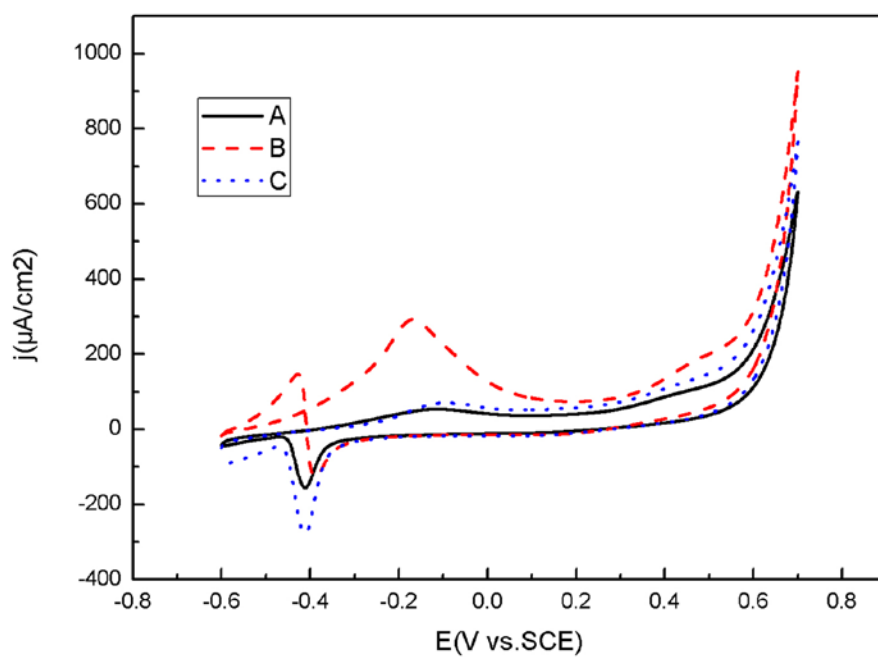

Fig. S2 CVs of as-prepared Pd NPs/GO at different volume ratios of GO and Pd modified GCE in 0.1 M NaOH with 5mM glucose. A) 10:1, B) 20:1, C) 40:1. Reaction time: 15 min. Scan rate: 10 mV/s.

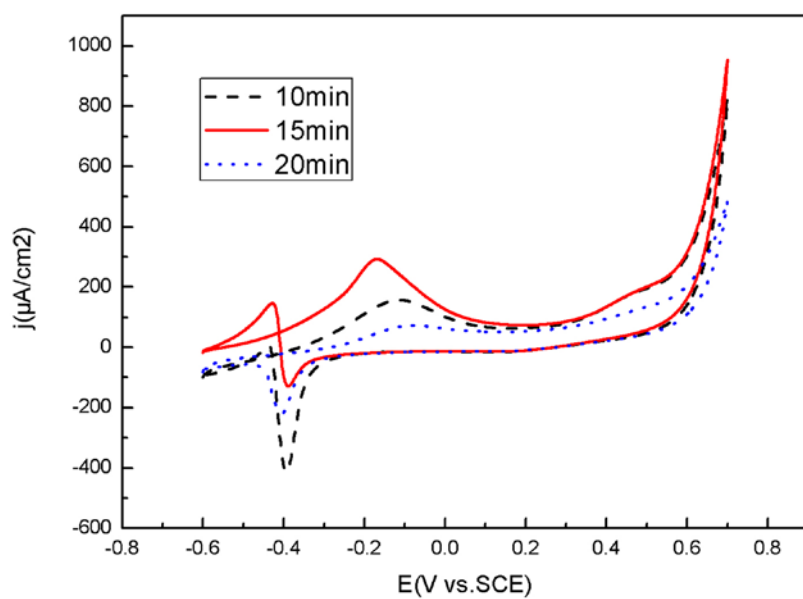

Fig. S3 CVs of as-prepared Pd NPs/GO prepared at different ultrasound time (10 min, 15 min and 20 min) modified GCE in 5 mM glucose solution with 0.1 M NaOH. Volume ratios of GO and Pd: 20:1. Scan rate: 10 mV/s.

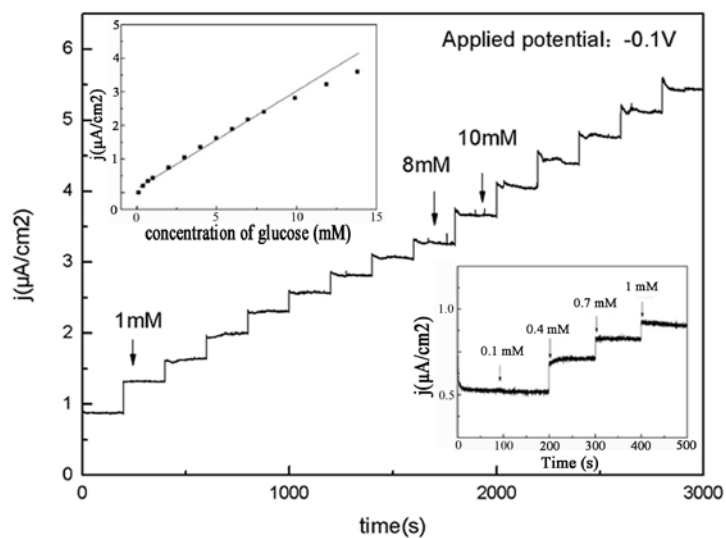

Fig. S4 Typical current density–time dynamic response of as-synthesized Pd NPs/GO-nafion (reaction time: 15 min. volume ratios of GO and Pd: 20:1) modified GCE towards successive addition of 1 mM glucose in NaOH (0.1 M) at  $-0.1\text{ V}$ , the left inset is the calibration curve for glucose detection, the right inset is amplified response curve.

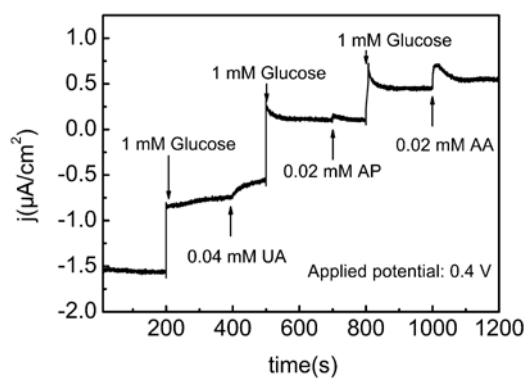

Fig. S5 Typical current density–time dynamic response of as-synthesized Pd NPs/GO-nafion (reaction time: 15 min. volume ratios of GO and Pd: 20:1) modified GCE towards interferences and glucose in NaOH (0.1 M) at 0.4 V.
